# Supplementary material
Source: publisher figshare collection journal article supplement (https://sage.figshare.com/ndownloader/files/31566798)
Supplement: Supplementary file 1 [file 31566798]

PAS (teacher, peer, parent)

Aut. mot. in PE

Con. mot. in PE

Aut. mot. in LT

Con. mot in LT

Attitude

PBC

Intention

LT MVPA

Self-reported PA

*Appendix.* The longitudinal study design.

PAS = Perceived autonomy support; Aut.mot. = Autonomous motivation; Con.mot. = Controlled motivation; PE = Physical education context; LT = Leisure-time context; PBC = Perceived behavioural control; PA = Physical activity; MVPA = Moderate-to-vigorous physical activity measured by accelerometers.

PAS (teacher, peer, parent)

Aut. mot. in PE

Con. mot. in PE

Aut. mot. in LT

Con. mot. in LT

Attitude

PBC

Intention

Self-reported PA

LT MVPA

Self-reported PA

PAS (teacher, peer, parent)

Aut. mot. in PE

Con. mot. in PE

Aut. mot. in LT

Con. mot. in LT

Attitude

PBC

Intention

Self-reported PA

PAS (teacher, peer, parent)

Aut. mot. in PE

Con. mot. in PE

Aut. mot. in LT

Con. mot. in LT

Attitude

PBC

Intention

Self-reported PA

LT MVPA

Self-reported PA

1st wave

3rd wave

2nd wave

1st wave

3rd wave

2nd wave

1 year

2nd data collection occasion

1st data collection occasion

5 weeks

5 weeks

5 weeks

5 weeks
